# Supplementary material for: Surface state modulation of blue-emitting carbon dots with high quantum yield and high product yield
Source: Royal Society of Chemistry journal article supplement (doi:10.1039/d2ra05623b), 2022-01-01
Supplement: d2ra05623b1.pdf [file d2ra05623b1.pdf]

***Electronic Supplementary Information for***  
**Surface state modulation of blue-emitting carbon dots with high  
quantum yield and high product yield**

Mingxiu Lei <sup>a</sup>, Yanting Xie <sup>a</sup>, Lin Chen <sup>ab</sup>, Xinghua Liu <sup>a</sup>, Yongzhen Yang <sup>\*ab</sup>, Jingxia  
Zheng <sup>\*ab</sup>, Qiang Li <sup>\*c</sup>

<sup>a</sup>*Key Laboratory of Interface Science and Engineering in Advanced Materials, Ministry of  
Education, Taiyuan University of Technology, Taiyuan 030024, China*

<sup>b</sup>*Shanxi-Zheda Institute of Advanced Materials and Chemical Engineering, Taiyuan 030032, China*

<sup>c</sup>*Intervention Department of the Second Hospital of Shanxi Medical University, Taiyuan 030001,  
China*

E-mail: yyztyut@126.com, zhengjingxia@tyut.edu.cn, liqiang8702226@163.com.

## Supplementary Figures and Tables

**Table S1** Comparison of QY and PY values of CDs synthesized with different carbon sources (silane coupling agent is KH-792)

| CDs    | Molecular structure of carbon source                                                                                                                                 | n                                         | QY/%  | PY/%  |
|--------|----------------------------------------------------------------------------------------------------------------------------------------------------------------------|-------------------------------------------|-------|-------|
| TA-CDs | $\begin{array}{c} \text{H} \\   \\ \text{HO}-\text{C}-\text{COOH} \\   \\ \text{HO}-\text{C}-\text{COOH} \end{array}$                                                | -COOH: 2<br>-OH: 2                        | 2.89  | 54.74 |
| MA-CDs | $\begin{array}{c} \text{H} \\   \\ \text{HO}-\text{C}-\text{COOH} \\   \\ \text{H}_2\text{C}-\text{COOH} \end{array}$                                                | -COOH: 2<br>-OH: 1                        | 3.06  | 57.21 |
| LA-CDs | $\begin{array}{c} \text{H} \\   \\ \text{HO}-\text{C}-\text{COOH} \\   \\ \text{CH}_3 \end{array}$                                                                   | -COOH: 1<br>-OH: 1                        | 3.31  | 58.76 |
| OA-CDs | $\begin{array}{c} \text{COOH} \\   \\ \text{COOH} \\   \\ \text{H}_2\text{C}-\text{COOH} \end{array}$                                                                | -COOH: 2<br>-OH: 0                        | 3.44  | 56.73 |
| a-CDs  | $\begin{array}{c} \text{H}_2\text{C}-\text{COOH} \\   \\ \text{HO}-\text{C}-\text{COOH} \\   \\ \text{H}_2\text{C}-\text{COOH} \end{array}$                          | -COOH: 3<br>-OH: 1                        | 60.52 | 54.19 |
| CA-CDs | $\begin{array}{c} \text{H}_2\text{C}-\text{COOH} \quad \text{H}_2\text{O} \\   \\ \text{HO}-\text{C}-\text{COOH} \\   \\ \text{H}_2\text{C}-\text{COOH} \end{array}$ | -COOH: 3<br>-OH: 1<br>H <sub>2</sub> O: 1 | 97.32 | 52.56 |

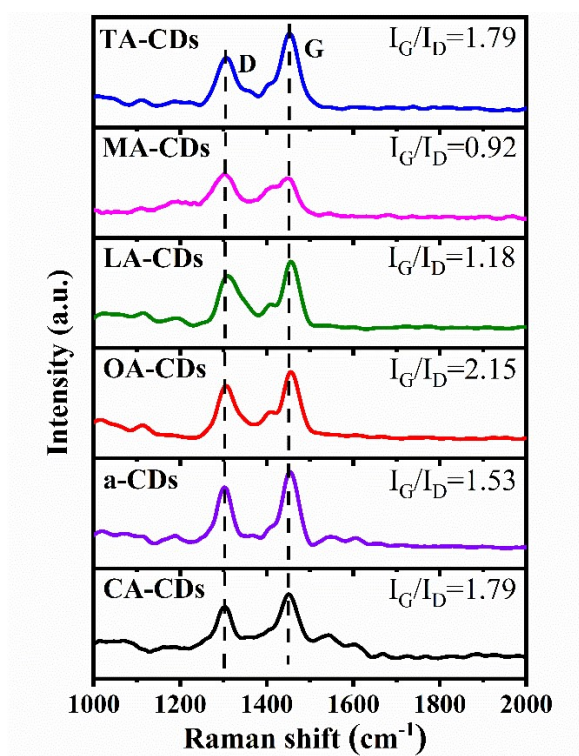

**Fig. S1** Raman spectrum of CDs synthesized with different carbon sources (silane coupling agent

is KH-792)

**Table S2** Elemental analysis of CDs synthesized with different carbon sources  
(silane coupling agent is KH-792)

| CDs    | C/%   | H/%  | N/%   | O/%   | Si/%  |
|--------|-------|------|-------|-------|-------|
| TA-CDs | 37.30 | 8.92 | 16.05 | 6.76  | 30.79 |
| MA-CDs | 37.60 | 8.82 | 15.96 | 6.27  | 31.36 |
| LA-CDs | 37.75 | 8.56 | 16.01 | 5.72  | 31.96 |
| OA-CDs | 37.49 | 9.10 | 16.21 | 6.80  | 30.40 |
| a-CDs  | 38.94 | 8.57 | 16.43 | 6.95  | 29.11 |
| CA-CDs | 36.25 | 7.98 | 15.29 | 14.71 | 25.77 |

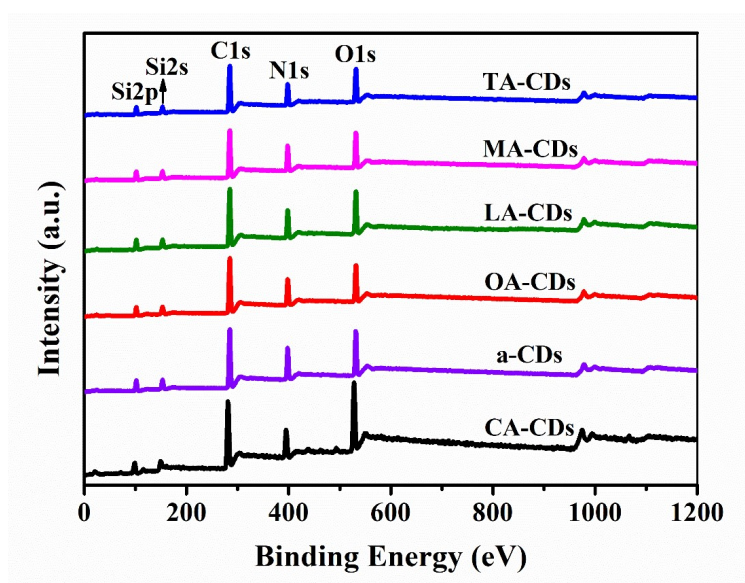

**Fig. S2** XPS spectrum of CDs synthesized with different carbon sources (silane coupling agent is KH-792)

**Table S3** Element content analysis of XPS for CDs synthesized with different carbon sources (silane coupling agent is KH-792)

| CDs    | C/%   | N/%   | O/%   | Si/%  |
|--------|-------|-------|-------|-------|
| TA-CDs | 60.06 | 14.44 | 14.87 | 10.62 |
| MA-CDs | 58.63 | 15.74 | 14.00 | 11.63 |
| LA-CDs | 57.89 | 14.94 | 15.17 | 12.00 |
| OA-CDs | 60.65 | 15.47 | 13.35 | 10.53 |
| a-CDs  | 57.82 | 16.15 | 14.56 | 11.46 |
| CA-CDs | 56.40 | 13.22 | 19.83 | 10.55 |

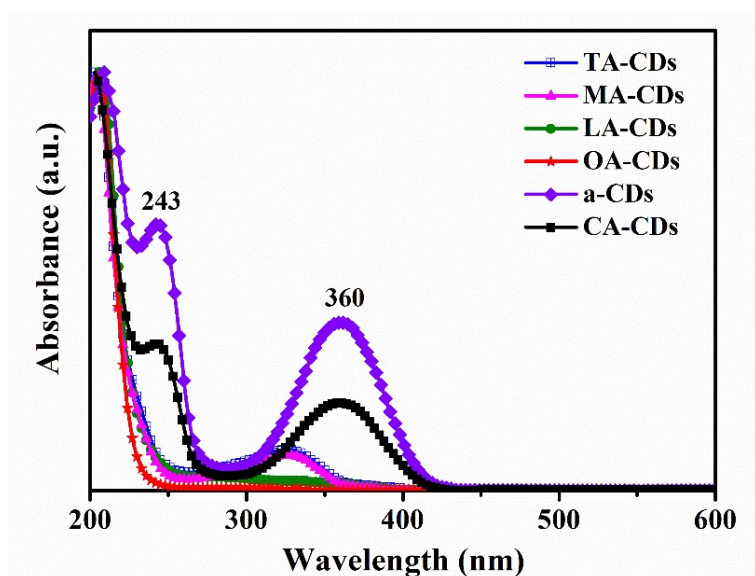

**Fig. S3** UV-vis absorption spectroscopy of CDs synthesized with different carbon sources (silane coupling agent is KH-792)

**Table S4** Fitting parameters of fluorescence decay curve of CDs synthesized with different carbon sources (silane coupling agent is KH-792)

| CDs    | $\alpha_1$ | $\tau_1$ (ns) | $\alpha_2$ | $\tau_2$ (ns) | $\chi^2$ | $\langle\tau\rangle$ (ns) |
|--------|------------|---------------|------------|---------------|----------|---------------------------|
| TA-CDs | 0.30       | 1.79          | 0.70       | 11.07         | 1.30     | 10.47                     |
| MA-CDs | 0.34       | 4.03          | 0.66       | 10.53         | 1.05     | 9.46                      |
| LA-CDs | 0.30       | 1.82          | 0.70       | 12.21         | 1.30     | 11.59                     |
| OA-CDs | 0.24       | 3.95          | 0.76       | 13.78         | 1.08     | 12.96                     |
| a-CDs  | 1.00       | 18.00         | –          | –             | 1.30     | 18.00                     |
| CA-CDs | 0.10       | 9.07          | 0.90       | 14.99         | 1.04     | 14.62                     |

**Table S5** Comparison of PY and QY values of CDs synthesized with different silane coupling agents (carbon source is CA)

| CDs     | Molecular structure of silane coupling agents                                       | n                                             | QY/%  | PY/%  |
|---------|-------------------------------------------------------------------------------------|-----------------------------------------------|-------|-------|
| 540-CDs | 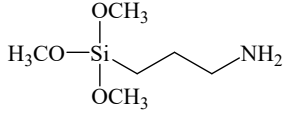 | -OCH <sub>3</sub> : 3<br>-NH <sub>2</sub> : 1 | 29.57 | 46.33 |
| 602-CDs |  | -OCH <sub>3</sub> : 2<br>-NH <sub>2</sub> : 2 | 84.53 | 58.53 |
| CA-CDs  |  | -OCH <sub>3</sub> : 3<br>-NH <sub>2</sub> : 2 | 97.32 | 52.56 |

**Table S6** Elemental analysis of CDs synthesized with different silane coupling agents (carbon source is CA)

| CDs     | C/%   | H/%  | N/%   | O/%   | Si/%  |
|---------|-------|------|-------|-------|-------|
| 540-CDs | 30.09 | 7.13 | 10.75 | 6.54  | 45.49 |
| 602-CDs | 38.60 | 8.51 | 16.42 | 6.66  | 29.81 |
| CA-CDs  | 36.25 | 7.98 | 15.29 | 14.71 | 25.77 |

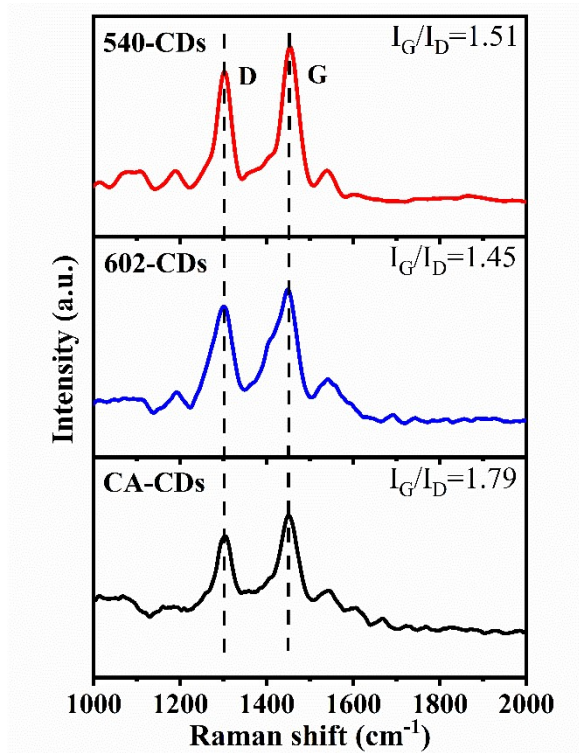

**Fig. S4** Raman spectrum of CDs synthesized with different silane coupling agents (carbon source is CA)

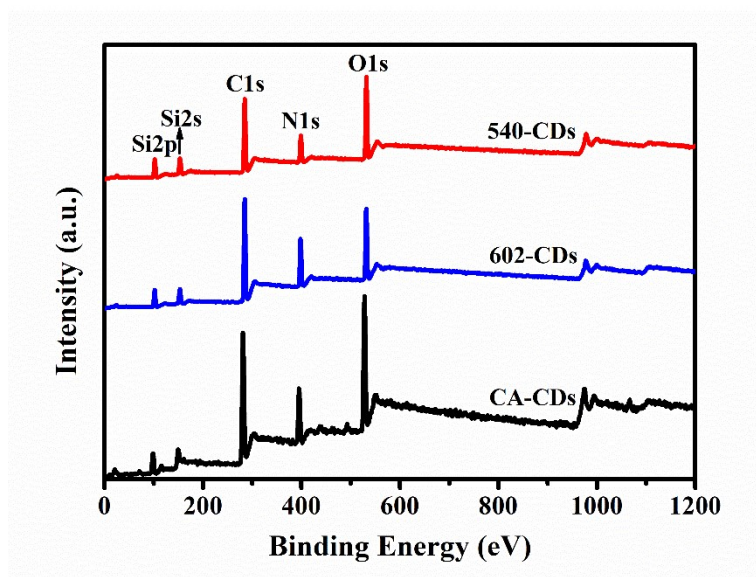

**Fig. S5** XPS spectrum of CDs synthesized with different silane coupling agents (carbon source is CA)

**Table S7** Elemental content analysis of XPS for CDs synthesized with different silane coupling agents (carbon source is CA)

| CDs     | C/%   | N/%   | O/%   | Si/%  |
|---------|-------|-------|-------|-------|
| 540-CDs | 54.46 | 10.73 | 19.66 | 15.15 |
| 602-CDs | 59.94 | 15.04 | 14.01 | 11.00 |
| CA-CDs  | 56.40 | 13.22 | 19.83 | 10.55 |

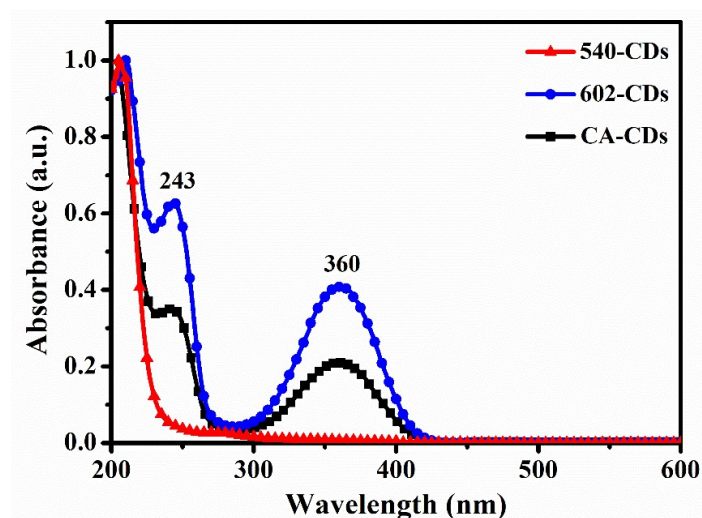

**Fig. S6** UV-vis absorption spectroscopy of CDs synthesized with different silane coupling agents (carbon source is CA)

**Table S8** Fitting parameters of fluorescence decay curve of CDs synthesized with different silane coupling agents (carbon source is CA)

| CDs     | $\alpha_1$ | $\tau_1$ (ns) | $\alpha_2$ | $\tau_2$ (ns) | $\chi^2$ | $\langle\tau\rangle$ (ns) |
|---------|------------|---------------|------------|---------------|----------|---------------------------|
| 540-CDs | 1.00       | 12.97         | –          | –             | 1.26     | 12.97                     |
| 602-CDs | 1.00       | 17.89         | –          | –             | 1.01     | 17.89                     |
| CA-CDs  | 0.10       | 9.07          | 0.90       | 14.99         | 1.04     | 14.62                     |
